# Supplementary material for: Multigene phylogeny of Endogonales, an early diverging lineage of fungi associated with plants
Source: PubMed Central journal article supplement — IMA Fungus. 2017 Oct 3;8(2):245–57. doi: 10.5598/imafungus.2017.08.02.03 (PMC5729711; doi:10.5598/imafungus.2017.08.02.03), 2017-10-03
Supplement: ima-8-245-SD3.pdf [file ima-8-245-SD3.pdf]

# Endogonaceae

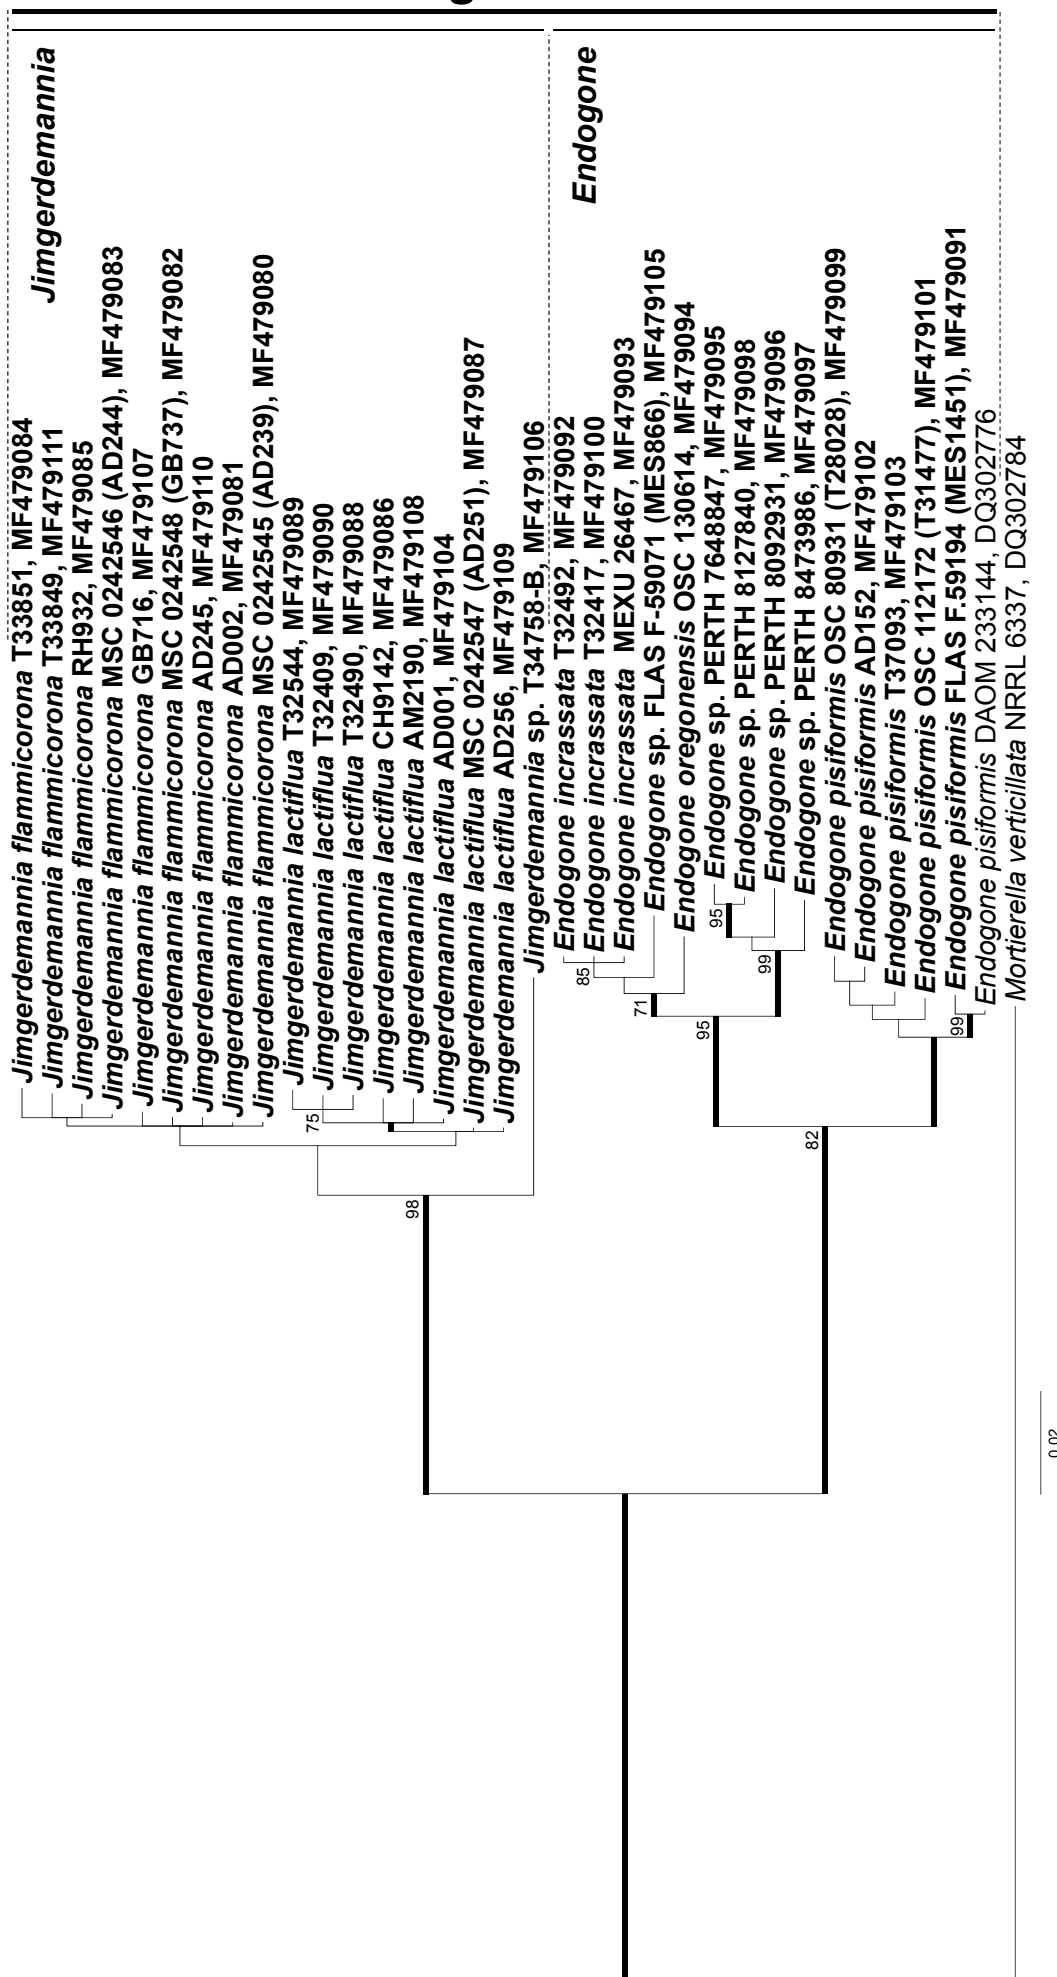

**Supplementary Fig. 3.** Phylogenetic reconstruction of *Endogonaceae* based on RPB2 sequences. *Mortierella verticillata* was used as outgroup. The tree shows the topology obtained with the Bayesian method; branches with Bayesian posterior probabilities  $\geq 0.95$  are thickened and ML bootstrap support values  $\geq 70$  are shown. Sequences generated in this study are in bold.
