# Supplementary material for: Multigene phylogeny of Endogonales, an early diverging lineage of fungi associated with plants
Source: PubMed Central journal article supplement — IMA Fungus. 2017 Oct 3;8(2):245–57. doi: 10.5598/imafungus.2017.08.02.03 (PMC5729711; doi:10.5598/imafungus.2017.08.02.03), 2017-10-03
Supplement: ima-8-245-SD4.pdf [file ima-8-245-SD4.pdf]

## Supplementary Table 1

**Supplementary Table 1.** List of the specimens and related DNA sequences used in the phylogenetic reconstructions carried out in this study. The table shows the GenBank or UNITE accession number of each specimen divided by gene (18S, 28S, EF1- $\alpha$ , RPB2). The specimens analyzed in this study are in bold. The numbers at the apex of each specimen indicate whether that specimen was used in the 18S (1), 28S (2), EF1- $\alpha$  (3), RPB2 (4) and/or multigene (\*) phylogenetic reconstruction.

| Specimen                                                                   | GenBank/UNITE Accession No. |                 |                 |                 |
|----------------------------------------------------------------------------|-----------------------------|-----------------|-----------------|-----------------|
|                                                                            | 18s                         | 28s             | Ef1- $\alpha$   | RPB2            |
| <i>Bifiguratus adelaidae</i> AZ0501 <sup>1,2</sup>                         | KX372677                    | HM123225        | -               | -               |
| <i>Bifiguratus adelaidae</i> TLT265 <sup>1,2</sup>                         | KX372676                    | KU702228        | -               | -               |
| <i>Bifiguratus adelaidae</i> YP243 <sup>1,2</sup>                          | KU702505                    | KU702551        | -               | -               |
| <i>Calcarisporiella thermophila</i> CBS 279.70 <sup>1,2</sup>              | AB597205                    | AB617741        | -               | -               |
| <i>Calcarisporiella thermophila</i> IFO 33269 <sup>2</sup>                 | -                           | AB617739        | -               | -               |
| <i>Calcarisporiella thermophila</i> NBRC 33279 <sup>1</sup>                | AB597204                    | -               | -               | -               |
| <i>Densospora nuda</i> DAR 69416 <sup>1</sup>                              | UDB018872                   | -               | -               | -               |
| <i>Densospora solicarpa</i> DAR 69421 <sup>1,2,*</sup>                     | UDB018865                   | UDB018864       | -               | -               |
| <i>Densospora solicarpa</i> DAR 74956 <sup>1,2,*</sup>                     | UDB018861                   | UDB018860       | -               | -               |
| <i>Endogone aggregata</i> DAR 74991 <sup>1,2,*</sup>                       | UDB018868                   | UDB018867       | -               | -               |
| <i>Endogone corticioides</i> A-11001 <sup>1,2,3,*</sup>                    | LC107350                    | LC107367        | LC107392        | -               |
| <i>Endogone corticioides</i> A-12001 <sup>1,2,3,*</sup>                    | LC107351                    | LC107368        | LC107393        | -               |
| <i>Endogone corticioides</i> A-13001-3 <sup>1,2,3,*</sup>                  | LC107352                    | LC107369        | LC107394        | -               |
| <i>Endogone corticioides</i> A-13001-4 <sup>1,2,3,*</sup>                  | LC107353                    | LC107370        | LC107395        | -               |
| <i>Endogone corticioides</i> A-14002 <sup>1,2,3,*</sup>                    | LC107355                    | LC107372        | LC107396        | -               |
| <i>Endogone incrassata</i> EI-11003 <sup>2</sup>                           | -                           | LC002618        | -               | -               |
| <i>Endogone incrassata</i> EI-12001 <sup>2</sup>                           | -                           | LC002619        | -               | -               |
| <i>Endogone incrassata</i> EI-12004 <sup>2</sup>                           | -                           | LC002620        | -               | -               |
| <i>Endogone incrassata</i> EI-12005 <sup>2</sup>                           | -                           | LC002621        | -               | -               |
| <i>Endogone incrassata</i> KPM-NC 0024213 <sup>1,3,*</sup>                 | LC107337                    | -               | LC107379        | -               |
| <i>Endogone incrassata</i> KPM-NC 0024214 <sup>1,3,*</sup>                 | LC107338                    | -               | LC107380        | -               |
| <b><i>Endogone incrassata</i> MEXU 26467<sup>1,4</sup></b>                 | KJ952220                    | -               | -               | <b>MF479093</b> |
| <b><i>Endogone incrassata</i> T32417<sup>1,3,4,*</sup></b>                 | JF414200                    | <b>MF479014</b> | <b>MF479076</b> | <b>MF479100</b> |
| <b><i>Endogone incrassata</i> T32492<sup>1,3,4,*</sup></b>                 | JF414199                    | -               | <b>MF479053</b> | <b>MF479092</b> |
| <i>Endogone magnospora</i> DAR 69441 <sup>1,2,*</sup>                      | UDB018869                   | UDB018870       | -               | -               |
| <b><i>Endogone oregonensis</i> AD153<sup>1,2,3,*</sup></b>                 | <b>MF478989</b>             | <b>MF479015</b> | <b>MF479073</b> | -               |
| <b><i>Endogone oregonensis</i> OSC 130614<sup>1,4</sup></b>                | JF414196                    | -               | -               | <b>MF479094</b> |
| <b><i>Endogone oregonensis</i> T36235<sup>1,2,3,*</sup></b>                | <b>MF478990</b>             | <b>MF479016</b> | <b>MF479072</b> | -               |
| <b><i>Endogone pisiformis</i> AD152<sup>1,2,3,4,*</sup></b>                | <b>MF478991</b>             | <b>MF479018</b> | <b>MF479071</b> | <b>MF479102</b> |
| <i>Endogone pisiformis</i> DAOM 233144 <sup>1,2,3,4,*</sup>                | DQ322628                    | DQ273811        | DQ282618        | DQ302776        |
| <b><i>Endogone pisiformis</i> FLAS F-59194 (MES1451)<sup>1,2,4,*</sup></b> | <b>MF478992</b>             | <b>MF479020</b> | -               | <b>MF479091</b> |
| <i>Endogone pisiformis</i> KPM-NC 0024229 <sup>1,2,3,*</sup>               | LC107346                    | LC107365        | LC107388        | -               |
| <i>Endogone pisiformis</i> KPM-NC 0024232 <sup>1,2,3,*</sup>               | LC107348                    | LC107366        | LC107390        | -               |
| <b><i>Endogone pisiformis</i> OSC 80931 (T28028)<sup>1,4</sup></b>         | JF414194                    | -               | -               | <b>MF479099</b> |
| <b><i>Endogone pisiformis</i> OSC 112172 (T31477)<sup>1,4</sup></b>        | KC708389                    | -               | -               | <b>MF479101</b> |
| <b><i>Endogone pisiformis</i> OSC 149839 (T37049)<sup>1,2</sup></b>        | <b>MF478993</b>             | <b>MF479021</b> | -               | -               |
| <b><i>Endogone pisiformis</i> T37093<sup>1,2,3,4,*</sup></b>               | <b>MF478994</b>             | <b>MF479019</b> | <b>MF479070</b> | <b>MF479103</b> |
| <b><i>Endogone</i> sp. FLAS F-59071 (MES866)<sup>1,2,3,4,*</sup></b>       | <b>MF478995</b>             | <b>MF479017</b> | <b>MF479075</b> | <b>MF479105</b> |
| <b><i>Endogone</i> sp. MEL 2024690<sup>1,3,*</sup></b>                     | <b>MF478996</b>             | -               | <b>MF479052</b> | -               |
| <b><i>Endogone</i> sp. PERTH 7567251<sup>2,3,*</sup></b>                   | -                           | <b>MF479022</b> | <b>MF479048</b> | -               |
| <b><i>Endogone</i> sp. PERTH 7591853<sup>2,3,*</sup></b>                   | -                           | <b>MF479023</b> | <b>MF479049</b> | -               |
| <b><i>Endogone</i> sp. PERTH 7603037<sup>1,3,*</sup></b>                   | <b>MF478997</b>             | -               | <b>MF479047</b> | -               |
| <b><i>Endogone</i> sp. PERTH 7648049<sup>1,3,*</sup></b>                   | KM594019                    | -               | <b>MF479074</b> | -               |
| <b><i>Endogone</i> sp. PERTH 7648847<sup>1,3,4,*</sup></b>                 | KM594020                    | -               | <b>MF479069</b> | <b>MF479095</b> |
| <b><i>Endogone</i> sp. PERTH 7672527<sup>1,2,3,*</sup></b>                 | <b>MF478998</b>             | <b>MF479024</b> | <b>MF479050</b> | -               |
| <b><i>Endogone</i> sp. PERTH 8092931<sup>1,3,4,*</sup></b>                 | <b>MF478999</b>             | -               | <b>MF479068</b> | <b>MF479096</b> |
| <b><i>Endogone</i> sp. PERTH 8127840<sup>1,4</sup></b>                     | <b>MF479000</b>             | -               | -               | <b>MF479098</b> |
| <b><i>Endogone</i> sp. PERTH 8473986<sup>3,4</sup></b>                     | -                           | -               | <b>MF479051</b> | <b>MF479097</b> |

Supplementary Table 1. (Continued).

| Specimen                                                                                            | GenBank/UNITE Accession No.        |          |               |          |
|-----------------------------------------------------------------------------------------------------|------------------------------------|----------|---------------|----------|
|                                                                                                     | 18s                                | 28s      | Ef1- $\alpha$ | RPB2     |
| <i>Endogone</i> sp. T26631 <sup>1,2,3,*</sup>                                                       | JF414198                           | MF479025 | JF414136      | -        |
| <i>Endogone tuberculosa</i> OSC 146000 (T34145) <sup>2,*</sup>                                      | -                                  | MF479026 | -             | -        |
| Fine root endophyte OTU0 associated with <i>Trifolium subterraneum</i> <sup>1</sup>                 | KX434773                           | -        | -             | -        |
| Fine root endophyte OTU4 associated with <i>Trifolium subterraneum</i> <sup>1</sup>                 | KX434777                           | -        | -             | -        |
| Fine root endophyte OTU8 associated with <i>Trifolium subterraneum</i> <sup>1</sup>                 | KX434780                           | -        | -             | -        |
| Fine root endophyte OTU10 associated with <i>Trifolium subterraneum</i> <sup>1</sup>                | KX434782                           | -        | -             | -        |
| <i>Jimgerdemannia flammicorona</i> AD002 <sup>1,2,3,4,*</sup>                                       | MF479001                           | MF479027 | MF479078      | MF479081 |
| <i>Jimgerdemannia flammicorona</i> AD245 <sup>1,2,3,4,*</sup>                                       | MF479002                           | MF479028 | MF479063      | MF479110 |
| <i>Jimgerdemannia flammicorona</i> EF-13002 <sup>1,2,3,*</sup>                                      | LC107332                           | LC107360 | LC107375      | -        |
| <i>Jimgerdemannia flammicorona</i> GB716 <sup>1,2,3,4,*</sup>                                       | MF479003                           | MF479029 | MF479061      | MF479107 |
| <i>Jimgerdemannia flammicorona</i> MSC 0242545 (AD239) <sup>1,2,3,4,*</sup>                         | MF479004                           | MF479030 | MF479062      | MF479080 |
| <i>Jimgerdemannia flammicorona</i> MSC 0242546 (AD244) <sup>1,2,3,4,*</sup>                         | MF479005                           | MF479031 | MF479065      | MF479083 |
| <i>Jimgerdemannia flammicorona</i> MSC 0242548 (GB737) <sup>1,2,3,4,*</sup>                         | MF479006                           | MF479032 | MF479067      | MF479082 |
| <i>Jimgerdemannia flammicorona</i> RH932 <sup>1,2,3,4,*</sup>                                       | MF479007                           | MF479033 | MF479079      | MF479085 |
| <i>Jimgerdemannia flammicorona</i> T33849 <sup>1,2,3,4,*</sup>                                      | JF414204                           | MF479034 | MF479064      | MF479111 |
| <i>Jimgerdemannia flammicorona</i> T33851 <sup>1,2,3,4,*</sup>                                      | MF479008                           | MF479035 | JF414139      | MF479084 |
| <i>Jimgerdemannia lactiflua</i> AD001 <sup>1,2,3,4,*</sup>                                          | KM594016                           | MF479036 | MF479054      | MF479104 |
| <i>Jimgerdemannia lactiflua</i> AD256 <sup>1,2,3,4,*</sup>                                          | MF479009                           | MF479037 | MF479059      | MF479109 |
| <i>Jimgerdemannia lactiflua</i> AM2190 <sup>1,3,4,*</sup>                                           | KM594017                           | -        | MF479060      | MF479108 |
| <i>Jimgerdemannia lactiflua</i> CH9142 <sup>1,2,4,*</sup>                                           | KM594018                           | MF479038 | -             | MF479086 |
| <i>Jimgerdemannia lactiflua</i> EL-1400 <sup>1,2,3,*</sup>                                          | LC107343                           | LC107364 | LC107385      | -        |
| <i>Jimgerdemannia lactiflua</i> MSC 0242547 (AD251) <sup>2,3,4,*</sup>                              | -                                  | MF479039 | MF479058      | MF479087 |
| <i>Jimgerdemannia lactiflua</i> T32409 <sup>1,2,3,4,*</sup>                                         | MF479010                           | MF479040 | MF479057      | MF479090 |
| <i>Jimgerdemannia lactiflua</i> T32490 <sup>1,2,3,4,*</sup>                                         | MF479011                           | MF479041 | MF479055      | MF479088 |
| <i>Jimgerdemannia lactiflua</i> T32544 <sup>1,2,3,4,*</sup>                                         | JF414202                           | MF479042 | MF479077      | MF479089 |
| <i>Jimgerdemannia lactiflua</i> T32674 <sup>1,2,3,*</sup>                                           | JF414203                           | MF479043 | MF479056      | -        |
| <i>Jimgerdemannia</i> sp. T34758-A <sup>1,2,3,*</sup>                                               | MF479012                           | MF479044 | MF479066      | -        |
| <i>Jimgerdemannia</i> sp. T34758-B <sup>1,2,3,4,*</sup>                                             | MF479013                           | MF479045 | MF479046      | MF479106 |
| <i>Mortierella verticillata</i> NRRL 6337 <sup>1,2,3,4</sup>                                        | NG 017188                          | DQ273794 | AF157262      | DQ302784 |
| <i>Mucoromycotina</i> sp. 9152.1-D associated with <i>Neohodgsonia mirabilis</i> <sup>1</sup>       | KR779279                           | -        | -             | -        |
| <i>Mucoromycotina</i> sp. associated with <i>Anthoceros laminiferus</i> <sup>1</sup>                | KC708434,<br>KC708435              | -        | -             | -        |
| <i>Mucoromycotina</i> sp. associated with <i>Megaceros</i> sp. <sup>1</sup>                         | KC708436                           | -        | -             | -        |
| <i>Mucoromycotina</i> sp. associated with <i>Phaeoceros carolinianus</i> <sup>1</sup>               | KC708431,<br>KC708441,<br>KC708444 | -        | -             | -        |
| <i>Mucoromycotina</i> sp. associated with <i>Phaeomegaceros coriaceus</i> <sup>1</sup>              | KC708429,<br>KC708432,<br>KC708433 | -        | -             | -        |
| <i>Mucoromycotina</i> sp. FT2 associated with <i>Treubia lacunosa</i> <sup>1</sup>                  | KM211581                           | -        | -             | -        |
| <i>Mucoromycotina</i> sp. H2-e associated with <i>Haplomitrium gibbsiae</i> <sup>1</sup>            | KJ921775                           | -        | -             | -        |
| <i>Mucoromycotina</i> sp. JD78 associated with <i>Phaeoceros laevis</i> <sup>1</sup>                | KC708438                           | -        | -             | -        |
| <i>Mucoromycotina</i> sp. JD92 associated with <i>Anogramma leptophylla</i> <sup>1</sup>            | KJ952217                           | -        | -             | -        |
| <i>Mucoromycotina</i> sp. MES1534 <sup>1,2,*</sup>                                                  | KY487058                           | KY487061 | -             | -        |
| <i>Mucoromycotina</i> sp. MIB 8349 associated with <i>Paraphymatoceros coriaceus</i> <sup>1,3</sup> | JF414225                           | -        | JF414166      | -        |
| <i>Mucoromycotina</i> sp. MIB 8349 associated with <i>Treubia tasmanica</i> <sup>1</sup>            | JF414225                           | -        | -             | -        |
| <i>Mucoromycotina</i> sp. MIB 8351 associated with <i>Treubia lacunosa</i> <sup>1,3</sup>           | -                                  | -        | JF414156      | -        |
| <i>Mucoromycotina</i> sp. MIB 8352 associated with <i>Haplomitrium gibbsiae</i> <sup>1</sup>        | JF414222                           | -        | -             | -        |
| <i>Mucoromycotina</i> sp. MIB 8353 associated with <i>Treubia lacunosa</i> <sup>1</sup>             | JF414214,<br>JF414226              | -        | -             | -        |
| <i>Mucoromycotina</i> sp. MIB 8353 associated with <i>Treubia lacunosa</i> <sup>2,3</sup>           | -                                  | JF414167 | JF414159      | -        |

Supplementary Table 1. (Continued).

| Specimen                                                                                          | GenBank/UNITE Accession No.        |                       |                       |      |
|---------------------------------------------------------------------------------------------------|------------------------------------|-----------------------|-----------------------|------|
|                                                                                                   | 18s                                | 28s                   | Ef1- $\alpha$         | RPB2 |
| <i>Mucoromycotina</i> sp. MIB 8354 associated with <i>Treubia lacunosa</i> <sup>1,2,3</sup>       | JF414215                           | JF414168,<br>JF414169 | JF414161              | -    |
| <i>Mucoromycotina</i> sp. MIB 8355 associated with <i>Treubia lacunosa</i> <sup>2,3</sup>         | -                                  | JF414170              | JF414147              | -    |
| <i>Mucoromycotina</i> sp. MIB 8356 associated with <i>Treubia pygmaea</i> <sup>1</sup>            | JF414230                           | -                     | -                     | -    |
| <i>Mucoromycotina</i> sp. MIB 8358 associated with <i>Treubia pygmaea</i> <sup>1,3</sup>          | JF414220                           | -                     | JF414153              | -    |
| <i>Mucoromycotina</i> sp. MIB 8362 associated with <i>Treubia pygmaea</i> <sup>3</sup>            | -                                  | -                     | JF414154,<br>JF414165 | -    |
| <i>Mucoromycotina</i> sp. MIB 8363 associated with <i>Treubia lacunosa</i> <sup>1,3</sup>         | JF414219                           | -                     | JF414162              | -    |
| <i>Mucoromycotina</i> sp. MIB 8364 associated with <i>Treubia lacunosa</i> <sup>1,3</sup>         | JF414227                           | -                     | JF414150              | -    |
| <i>Mucoromycotina</i> sp. MIB 8365 associated with <i>Treubia lacunosa</i> <sup>1,3</sup>         | JF414228                           | -                     | -                     | -    |
| <i>Mucoromycotina</i> sp. MIB 8365 associated with <i>Treubia lacunosa</i> <sup>1,3</sup>         | JF414228                           | -                     | JF414151              | -    |
| <i>Mucoromycotina</i> sp. MIB 8372 associated with <i>Allisonia cockaynii</i> <sup>3</sup>        | -                                  | -                     | JF414142              | -    |
| <i>Mucoromycotina</i> sp. MIB 8387 associated with <i>Neohodgsonia mirabilis</i> <sup>1</sup>     | JF414224                           | -                     | -                     | -    |
| <i>Mucoromycotina</i> sp. MIB 8438.2 associated with <i>Phaeoceros carolinianus</i> <sup>1</sup>  | KC708392,<br>KC708393              | -                     | -                     | -    |
| <i>Mucoromycotina</i> sp. MIB 8439 associated with <i>Paraphymatoceros coriaceus</i> <sup>1</sup> | JF414225                           | -                     | -                     | -    |
| <i>Mucoromycotina</i> sp. MIB 8443 associated with <i>Anthoceros laminiferus</i> <sup>1</sup>     | KC708394                           | -                     | -                     | -    |
| <i>Mucoromycotina</i> sp. MIB 8445 associated with <i>Phaeoceros carolinianus</i> <sup>1</sup>    | KC708396                           | -                     | -                     | -    |
| <i>Mucoromycotina</i> sp. MIB 8447 associated with <i>Haplomitrium hookeri</i> <sup>1,3</sup>     | JF414213                           | -                     | JF414145              | -    |
| <i>Mucoromycotina</i> sp. MIB 8448 associated with <i>Haplomitrium blumeri</i> <sup>1</sup>       | JF414211                           | -                     | -                     | -    |
| <i>Mucoromycotina</i> sp. MIB 8478 associated with <i>Paraphymatoceros</i> sp. <sup>1</sup>       | JF414207                           | -                     | -                     | -    |
| <i>Mucoromycotina</i> sp. MIB 8532 associated with <i>Anthoceros agrestis</i> <sup>1</sup>        | KC708397                           | -                     | -                     | -    |
| <i>Mucoromycotina</i> sp. MIB 8533 associated with <i>Phaeoceros laevis</i> <sup>1</sup>          | KC708398                           | -                     | -                     | -    |
| <i>Mucoromycotina</i> sp. MIB 8550 associated with <i>Phaeoceros laevis</i> <sup>1</sup>          | KC708399                           | -                     | -                     | -    |
| <i>Mucoromycotina</i> sp. MIB 8553.2 associated with <i>Anthoceros</i> sp. <sup>1</sup>           | KC708400                           | -                     | -                     | -    |
| <i>Mucoromycotina</i> sp. MIB 8627.1 associated with <i>Anthoceros punctatus</i> <sup>1</sup>     | KC708404                           | -                     | -                     | -    |
| <i>Mucoromycotina</i> sp. MIB 8771 associated with <i>Phaeomegaceros coriaceus</i> <sup>1</sup>   | KC708406,<br>KC708407              | -                     | -                     | -    |
| <i>Mucoromycotina</i> sp. MIB 8779 associated with <i>Megaceros leptohymenius</i> <sup>1</sup>    | KC708408                           | -                     | -                     | -    |
| <i>Mucoromycotina</i> sp. MIB 8783 associated with <i>Phaeoceros carolinianus</i> <sup>1</sup>    | KC708411                           | -                     | -                     | -    |
| <i>Mucoromycotina</i> sp. MIB 8783 associated with <i>Phaeomegaceros coriaceus</i> <sup>1</sup>   | KC708409                           | -                     | -                     | -    |
| <i>Mucoromycotina</i> sp. MIB 8792 associated with <i>Phaeoceros carolinianus</i> <sup>1</sup>    | KC708412                           | -                     | -                     | -    |
| <i>Mucoromycotina</i> sp. MIB 8797 associated with <i>Phaeomegaceros coriaceus</i> <sup>1</sup>   | KC708413,<br>KC708415,<br>KC708416 | -                     | -                     | -    |
| <i>Mucoromycotina</i> sp. MIB 8802 associated with <i>Anthoceros laminiferus</i> <sup>1</sup>     | KC708417                           | -                     | -                     | -    |
| <i>Mucoromycotina</i> sp. MIB 8827 associated with <i>Phaeoceros carolinianus</i> <sup>1</sup>    | KC708419                           | -                     | -                     | -    |
| <i>Mucoromycotina</i> sp. MIB 8841 associated with <i>Phaeoceros dendroceroides</i> <sup>1</sup>  | KC708420                           | -                     | -                     | -    |
| <i>Mucoromycotina</i> sp. MIB 8842 associated with <i>Phaeoceros dendroceroides</i> <sup>1</sup>  | KC708421                           | -                     | -                     | -    |
| <i>Mucoromycotina</i> sp. MIB 8846 associated with <i>Phaeoceros carolinianus</i> <sup>1</sup>    | KC708423,<br>KC708440              | -                     | -                     | -    |
| <i>Mucoromycotina</i> sp. MIB 8860 associated with <i>Anthoceros</i> sp. <sup>1</sup>             | KC708425,<br>KC708426              | -                     | -                     | -    |
| <i>Mucoromycotina</i> sp. MIB 8861 associated with <i>Folioceros</i> sp. <sup>1</sup>             | KC708427                           | -                     | -                     | -    |
| <i>Mucoromycotina</i> sp. MIB 8873 associated with <i>Phaeoceros carolinianus</i> <sup>1</sup>    | KC708428                           | -                     | -                     | -    |
| <i>Mucoromycotina</i> sp. T1-a associated with <i>Treubia lacunosa</i> <sup>1</sup>               | KJ921770                           | -                     | -                     | -    |
| <i>Mucoromycotina</i> sp. T3-e associated with <i>Treubia lacunosa</i> <sup>1</sup>               | KJ921773                           | -                     | -                     | -    |
| <i>Mucoromycotina</i> sp. Th6-2 associated with <i>Lycopodiella inundata</i> <sup>1</sup>         | KJ952212                           | -                     | -                     | -    |
| <i>Mucoromycotina</i> sp. Th6-4 associated with <i>Lycopodiella inundata</i> <sup>1</sup>         | KJ952213                           | -                     | -                     | -    |
| <i>Mucoromycotina</i> sp. Th8a-4 associated with <i>Lycopodiella inundata</i> <sup>1</sup>        | KJ952214                           | -                     | -                     | -    |
| <i>Mucoromycotina</i> sp. WR148.B-B associated with <i>Lycopodium fastigiatum</i> <sup>1</sup>    | KJ952219                           | -                     | -                     | -    |

Supplementary Table 1. (Continued).

| Specimen                                                                                                | GenBank/UNITE Accession No. |           |               |      |
|---------------------------------------------------------------------------------------------------------|-----------------------------|-----------|---------------|------|
|                                                                                                         | 18s                         | 28s       | Ef1- $\alpha$ | RPB2 |
| <i>Mucoromycotina</i> sp. WR330-B associated with <i>Neohodgsonia mirabilis</i> <sup>1</sup>            | KR779282                    | -         | -             | -    |
| <i>Mucoromycotina</i> sp. WR343.b-B associated with <i>Allisonia cockaynei</i> <sup>1</sup>             | KR779277                    | -         | -             | -    |
| <i>Mucoromycotina</i> sp. WR865-D associated with <i>Anogramma leptophylla</i> <sup>1</sup>             | KJ952232                    | -         | -             | -    |
| <i>Sphaerocreas pubescens</i> KPM-NC 22969 <sup>1</sup>                                                 | AB752291                    | -         | -             | -    |
| <i>Sphaerocreas pubescens</i> KPM-NC 22971 <sup>1</sup>                                                 | AB755408                    | -         | -             | -    |
| <i>Sphaerocreas pubescens</i> KPM-NC 22973 <sup>1</sup>                                                 | AB752293                    | -         | -             | -    |
| <i>Sphaerocreas pubescens</i> NBRC 109377 <sup>1,2,3,*</sup>                                            | AB752295                    | LC107618  | LC107619      | -    |
| <i>Sphaerocreas pubescens</i> SP-11002 <sup>2</sup>                                                     | -                           | LC002631  | -             | -    |
| Uncultured ectomycorrhizal <i>Endogone</i> EME-12001 <sup>1,2,3,*</sup>                                 | LC159474                    | LC159476  | LC159478      | -    |
| Uncultured ectomycorrhizal <i>Endogone</i> EME-15001 <sup>1,2,3,*</sup>                                 | LC159475                    | LC159477  | LC159479      | -    |
| Uncultured ectomycorrhizal <i>Mucoromycotina</i> on <i>Eucalyptus regnans</i> L3138 <sup>1,2</sup>      | UDB002714                   | UDB002714 | -             | -    |
| Uncultured ectomycorrhizal <i>Mucoromycotina</i> on <i>Nothofagus cunninghamii</i> L3656 <sup>1,2</sup> | UDB004033                   | UDB004033 | -             | -    |
